# Supplementary material for: A phylogeny-driven genomic encyclopaedia of Bacteria and Archaea
Source: Springer Nature journal article supplement (doi:10.1038/nature08656), 2009-12-01
Supplement: 41586_2009_BFnature08656_MOESM333_ESM.pdf [file 41586_2009_BFnature08656_MOESM333_ESM.pdf]

## SUPPLEMENTARY INFORMATION

**Material and Methods:**Organism Selection, Cell growth and DNA preparation

Phylogenetic trees of 16S rRNAs from the greengenes database were used to guide the selection of organisms to be sequenced<sup>1</sup>. The GEBA pilot project targeted a broad range of species of archaea and bacteria with very diverse requirements for growth conditions. Table S1C lists 36 different media (DSMZ and ATCC) used for the growth of the 56 organisms whose genomes are analyzed in this paper, with their growth temperature ranging from 28°C to 65°C (1/3 of them grown under anaerobic conditions). Conditions for *efficient* cell lysis of the target organisms vary almost as much as conditions for cell growth. We established a routine for initial small scale tests to explore the required individual procedures for cell lysis, which when successful (microscopic observation of lysis) were scaled up for the large amounts of cell pastes required for the extraction of about 100 µg of high quality genomic DNA (gDNA) (tested by pulse field electrophoresis). Table S1C lists eight cell lysis buffers and varied incubation conditions for lysis, as well as the three procedures used for DNA purification from the lysed cells.

Sequencing and Assembling

Eleven microbes were sequenced by Sanger only approach (Table S2). In this approach, 8kb libraries were constructed from DNA fragments randomly sheared by Hydroshear (GeneMachines) with ends repaired by T4 DNA polymerase and Klenow fragment (New England Biolabs). End repaired fragments were size selected from an agarose gel and purified by using the QIAquick Gel Extraction Kit (Qiagen). Approximately 200 ng of sheared DNA was ligated into 100 ng of linearized, dephosphorylated pMCL200 vector with kanamycin resistance gene<sup>2</sup>. Ligation mixtures were electroporated into ElectroMAXDH10B cells (Invitrogen), and plated on agar plates containing kanamycin. White colonies were picked by using the robotic QPIX (Genetix) colony picker and grown in media containing glycerol to provide stocks for subsequent sequencing. Fosmid libraries were constructed by using the CopyControl™ Fosmid Production Kit (Epicentre). DNA was sheared and fragments were size-selected on an agarose pulsed-field gel, excised and purified before ligation in the pCCqFos vector. The ligated vector was packaged by using MaxPlax™ Lambda Packaging Extract (Epicentre) and used to transduce *E. coli* (EP300). Cloned genomic fragments were sequenced from both ends to depth of approximately 10x and shotgun reads were automatically assembled with three assemblers (phrap, PGA, Arachne)<sup>3,4</sup>. The best of these draft assemblies was used for annotation and as a starting point for genome completion.

The remaining forty-five genomes were sequenced using various combinations of pyrosequencing and traditional Sanger sequencing (Table S2). Thirty-two of them were drafted by combining in average 30x of standard 454 FLX data with 8x Sanger reads of 8kb and 40kb libraries and thirteen were completed by assembling together 25x of pyrosequence data and 8x of Sanger paired-end sequence from an 8kb-library .

### Genome Annotation

Annotation was performed using the IMG system (<http://img.jgi.doe.gov/cgi-bin/pub/main.cgi>) developed by JGI<sup>5</sup>. Automated metabolic network reconstruction of all 56 genomes was performed using the Pathway Tools platform version 12.5<sup>6</sup>. After generating an initial draft set of pathway genome databases, we manually inspected the report files and collected frequently missed annotations in a local enzyme mapping file, in order to capture any IMG-specific enzyme terminology<sup>7</sup>. The final pathway reconstructions were generated in a manner similar to the "Tier 3" pathway genome databases in BioCyc<sup>8</sup>.

### “Genome tree” phylogenetic tree building for bacterial genomes

A maximum likelihood phylogenetic tree for bacterial genomes was built upon a concatenated alignment of 31 phylogenetic marker genes. We included 53 GEBA bacteria and 667 bacterial complete genomes from Genbank for the tree building. Protein sequences for 31 phylogenetic marker genes (*dnaG*, *frz*, *infC*, *nusA*, *pgk*, *pyrG*, *rplA*, *rplB*, *rplC*, *rplD*, *rplE*, *rplF*, *rplK*, *rplL*, *rplM*, *rplN*, *rplP*, *rplS*, *rplT*, *rpmA*, *rpoB*, *rpsB*, *rpsC*, *rpsE*, *rpsI*, *rpsJ*, *rpsK*, *rpsM*, *rpsS*, *smpB*, and *tsf*) were retrieved, aligned, trimmed, and concatenated using the software AMPHORA<sup>9</sup>. A maximum likelihood tree was then constructed from the concatenated-alignment using PHYML<sup>10</sup>. The model selected based on the likelihood ratio test was the WAG model of amino acid substitution with  $\gamma$ -distributed rate variation (five categories) and a proportion of invariable sites. The shape of the  $\gamma$ -distribution and the proportion of the invariable sites were estimated by the program.

### Phylogenetic Diversity (PD) estimation

The maximum likelihood phylogenetic tree was used to estimate the phylogenetic contribution of the GEBA pilot project. PD (phylogenetic diversity) is a measure of the length of the branches in a phylogenetic tree. The PD contribution of GEBA project is the total length of the added branches by the addition of the 53 GEBA bacterial genomes. 100 random sampling of 53 genomes from the genome tree (include or exclude GEBA organisms) were selected to calculate the correspondent PD contributions to compare with the GEBA PD contribution. The same approach was adopted to compare the PD contribution of the 26 GEBA actinobacteria with the other 47 actinobacteria.

### Rate of gene family discovery in different genome sets

Protein families were identified using the Markov Clustering Algorithm (MCL)<sup>11</sup>. An all versus all BLASTP search was performed for the entire proteomes of the 56 GEBA genomes. All matches with an E-value lower than 1e-10 with matches spanning at least 80% the lengths of both sequences were used as links for MCL clustering. Each cluster is treated as a protein family. Protein families were built separately for the following four groups of genomes: 53 bacterial genomes from the GEBA project, 73 actinobacterial genomes (including 26 GEBA genomes), 40 enterbacteriaceae genomes and eight

*Streptococcus agalactiae* genomes. For each group, we randomly selected a given number of genomes and calculated the number of protein families present in that set of genomes to estimate the novel gene family discovery rate.

#### Effect of GEBA genomes on genome analysis

For gene context and fusion analysis we used the corresponding information in the IMG 2.5 database using all the non-eukaryotic publicly available genomes (excluding GEBA genomes). We identified unique chromosomal neighborhoods and fusion events in the 56 GEBA genomes. Chromosomal neighborhood analyses were limited to the identification of new COG combinations found in chromosomal cassettes. A unique fusion event was considered a case where the fusion components are found fused for the first time. Genes that don't belong to any known protein families (COG, Pfam, TIGRFam) were used for protein family link identification. Conservation scores were calculated based upon all vs all BLASTP bit scores according to the equations described in the IMG manual<sup>5</sup>. None-GEBA proteins that exhibit conservation score greater than 0.25 were grouped using a single linkage algorithm. Subsequently we identified the genes in the GEBA genome that have conservation score greater than 0.25 to members of different clusters.

#### BARP (Bacterial Actin Related Protein) studies

For the ribbon plot in Figure 3, BARP from *H. ochraceum* (GI:227395998) was submitted to SWISS-MODEL (<http://swissmodel.expasy.org/SWISS-MODEL.html>) for 3D structural modeling. The Protein Data Bank entry 1C0F\_A (the actin from *Dictyostelium discoideum*)<sup>12</sup> was the best structure match and was used as the reference to build the 3D structure for BARP by SWISS-MODEL. The secondary structure elements of both the *H. ochraceum* actin and 1C0F\_A were defined by DSSP from their 3D models<sup>13</sup>. The two sequences were aligned to each other by MUSCLE<sup>14</sup>, and the secondary structure elements were illustrated alongside the alignments by ALINE<sup>15</sup>.

For BARP expression study, DNA and RNA from *H. ochraceum* SMP-2 were harvested from cells actively growing on VY/4-SWS (DSMZ) agar plates. Cells were scraped and re-suspended in VY/4-SWS medium lacking yeast cell paste. Total RNA was extracted by hot phenol method<sup>16</sup>. For RT-PCR, cDNA was prepared from 10 ug of total RNA using Primer L6actin (5'-GAACCCGGCGAACTGGGCATC-3') as previously described<sup>17</sup>. Chromosomal DNA and cDNA were used to amplify a 1062-bp region using primers RT-D1 (5'-GATAATGAGTTCGCGCCGTG-3') and RT-U1 (5'-GTATTCTCCAGCCCCATTATC-3'). PCR reactions were performed using the following time settings: 95°C denaturation for 1', 62°C annealing for 30", and a 2' extension at 70°C for 30 cycles. For the RNase control, RNA was digested with RNase for 1 hr prior to cDNA preparation.

For the phylogenetic study of BARP, homologs of BARP were retrieved from the NRAA database by BLASTP, representatives from actin and different actin related protein families were selected. Alignments were built by MUSCLE<sup>14</sup> for BARP, actin related

proteins and MreB. A phylogenetic tree was built by PHYML<sup>10</sup> using settings exactly like the concatenated bacterial genome tree building.

#### Phylogenetic coverage of current sequencing projects

A phylogenetic tree was built for a combined alignment of SSU rRNA sequences from the published complete bacterial and archaeal genomes, GEBA genomes and a non-redundant subset of greengenes SSU-rRNA<sup>1</sup>. The non-redundant subset of greengenes SSU rRNA was obtained by MCL clustering of SSU rRNA sequences with higher than 99% identity over 80% sequence length span<sup>11</sup>. Alignments of the non-redundant greengenes SSU-rRNAs along with the SSU rRNA from the sequencing projects were retrieved from the greengenes database. The mask defined by the greengenes project was applied to trim the alignments. A neighbor-joining tree was built from this alignment using FastTree<sup>18</sup>. A greedy algorithm was applied to list all the taxa included in the tree in the descending order according to their contributions to the phylogenetic diversity (PD)<sup>19</sup>.

- 1 DeSantis, T. Z. *et al*. Greengenes, a chimera-checked 16S rRNA gene database and workbench compatible with ARB. *Appl Environ Microbiol* **72**, 5069-5072 (2006).
- 2 Nakano, Y., Yoshida, Y., Yamashita, Y. & Koga, T. Construction of a series of pACYC-derived plasmid vectors. *Gene* **162**, 157-158 (1995).
- 3 de la Bastide, M. & McCombie, W. R. Assembling genomic DNA sequences with PHRAP. *Curr Protoc Bioinformatics* **Chapter 11**, Unit11 14 (2007).
- 4 Batzoglou, S. *et al*. ARACHNE: a whole-genome shotgun assembler. *Genome Res* **12**, 177-189 (2002).
- 5 Markowitz, V. M. *et al*. The integrated microbial genomes (IMG) system. *Nucleic Acids Res* **34**, D344-348 (2006).
- 6 Karp, P. D., Paley, S. & Romero, P. The Pathway Tools software. *Bioinformatics* **18 Suppl 1**, S225-232 (2002).
- 7 Green, M. L. & Karp, P. D. A Bayesian method for identifying missing enzymes in predicted metabolic pathway databases. *BMC Bioinformatics* **5**, 76, (2004).
- 8 Caspi, R. *et al*. The MetaCyc Database of metabolic pathways and enzymes and the BioCyc collection of Pathway/Genome Databases. *Nucleic Acids Res* **36**, D623-631(2008).
- 9 Wu, M. & Eisen, J. A. A simple, fast, and accurate method of phylogenomic inference. *Genome Biol* **9**, R151 (2008).
- 10 Guindon, S. & Gascuel, O. A simple, fast, and accurate algorithm to estimate large phylogenies by maximum likelihood. *Syst Biol* **52**, 696-704 (2003).
- 11 Enright, A. J., Van Dongen, S. & Ouzounis, C. A. An efficient algorithm for large-scale detection of protein families. *Nucleic Acids Res* **30**, 1575-1584 (2002).
- 12 Matsuura, Y. *et al*. Structural basis for the higher Ca(2+)-activation of the regulated actin-activated myosin ATPase observed with Dictyostelium/Tetrahymena actin chimeras. *J Mol Biol* **296**, 579-595 (2000).

- 13 Kabsch, W. & Sander, C. Dictionary of protein secondary structure: pattern recognition of hydrogen-bonded and geometrical features. *Biopolymers* **22**, 2577-2637 (1983).
- 14 Edgar, R. C. MUSCLE: multiple sequence alignment with high accuracy and high throughput. *Nucleic Acids Res* **32**, 1792-1797 (2004).
- 15 Bond, C. S. & Schuttelkopf, A. W. ALINE: a WYSIWYG protein-sequence alignment editor for publication-quality alignments. *Acta Crystallogr D Biol Crystallogr* **65**, 510-512 (2009).
- 16 Garza, A. G., Harris, B. Z., Greenberg, B. M. & Singer, M. Control of asgE expression during growth and development of *Myxococcus xanthus*. *J Bacteriol* **182**, 6622-6629 (2000).
- 17 Diodati, M. E. *et al.* Nla18, a key regulatory protein required for normal growth and development of *Myxococcus xanthus*. *J Bacteriol* **188**, 1733-1743 (2006).
- 18 Price, M. N., Dehal, P. S. & Arkin, A. P. FastTree: Computing Large Minimum-Evolution Trees with Profiles instead of a Distance Matrix. *Mol Biol Evol* (2009).
- 19 Moulton, V., Semple, C. & Steel, M. Optimizing phylogenetic diversity under constraints. *J Theor Biol* **246**, 186-194 (2007).

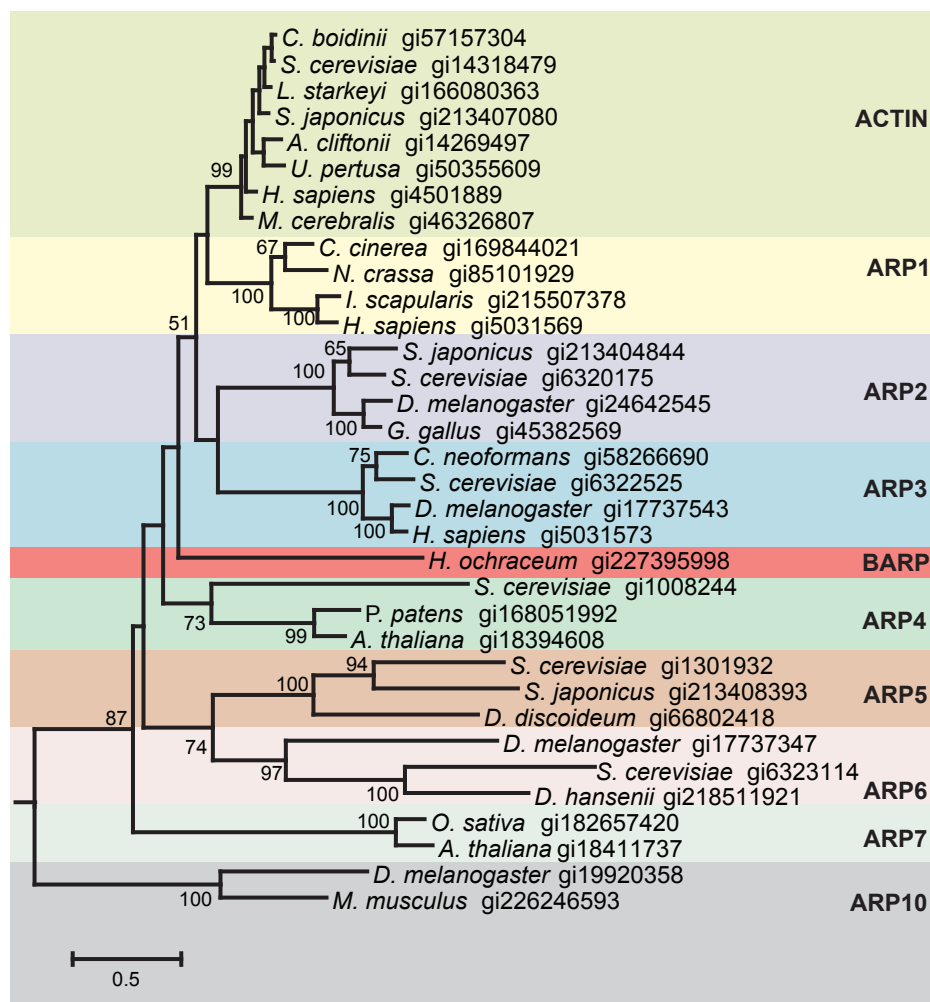

**Figure S1. Maximum likelihood tree of the *H. ochraceum* Bacterial Actin Related Protein (BARP) with representatives of eukaryotic actin and eukaryotic actin related protein (ARP) families.** The tree was built from a protein multiple sequence alignment using PHYML. The tree was rooted using MreB proteins from *H. ochraceum* and *E. coli* as outgroups (not shown).

Table S1 A. Taxonomic information of the organisms in the GEBA pilot project

| Name                                                                       | Domain   | Phylum              | Class                 | Subclass          | Order                | Suborder            | Family                |
|----------------------------------------------------------------------------|----------|---------------------|-----------------------|-------------------|----------------------|---------------------|-----------------------|
| <i>Halogeometricum borinquense</i> PR3                                     | Archaea  | Euryarchaeota       | Halobacteria          | -                 | Halobacteriales      | -                   | Halobacteriaceae      |
| <i>Halomicrobium mukohataei</i> arg-2                                      | Archaea  | Euryarchaeota       | Halobacteria          | -                 | Halobacteriales      | -                   | Halobacteriaceae      |
| <i>Halorhabdus utahensis</i> AX-2                                          | Archaea  | Euryarchaeota       | Halobacteria          | -                 | Halobacteriales      | -                   | Halobacteriaceae      |
| <i>Acidimicrobium ferrooxidans</i> ICP                                     | Bacteria | Actinobacteria      | Actinobacteria        | Acidimicrobiales  | Acidimicrobiales     | Acidimicrobiales    | Acidimicrobiaceae     |
| <i>Catenulispora acidiphila</i> ID 139908                                  | Bacteria | Actinobacteria      | Actinobacteria        | Actinobacteridae  | Actinomycetales      | Catenulisporineae   | Catenulisporaceae     |
| <i>Gordonia bronchialis</i> Tsukamura 3410                                 | Bacteria | Actinobacteria      | Actinobacteria        | Actinobacteridae  | Actinomycetales      | Corynebacterineae   | Nocardiaceae          |
| <i>Tsukamurella paurometabola</i>                                          | Bacteria | Actinobacteria      | Actinobacteria        | Actinobacteridae  | Actinomycetales      | Corynebacterineae   | Tsukamurellaceae      |
| <i>Geodermatophilus obscurus</i> G-20                                      | Bacteria | Actinobacteria      | Actinobacteria        | Actinobacteridae  | Actinomycetales      | Frankineae          | Geodermatophilaceae   |
| <i>Nakamurella multipartita</i> Y-104                                      | Bacteria | Actinobacteria      | Actinobacteria        | Actinobacteridae  | Actinomycetales      | Frankineae          | Nakamurellaceae       |
| <i>Stackebrandtia nassataensis</i> L.L.R-40K-21                            | Bacteria | Actinobacteria      | Actinobacteria        | Actinobacteridae  | Actinomycetales      | Glycomycineae       | Glycomycetaceae       |
| <i>Beutenbergia cavernae</i> HKI 0122                                      | Bacteria | Actinobacteria      | Actinobacteria        | Actinobacteridae  | Actinomycetales      | Micrococccineae     | Beutenbergiaceae      |
| <i>Cellulomonas flavigena</i> 134                                          | Bacteria | Actinobacteria      | Actinobacteria        | Actinobacteridae  | Actinomycetales      | Micrococccineae     | Cellulomonadaceae     |
| <i>Brachyбактерium faecium</i> Scheffle 6-10                               | Bacteria | Actinobacteria      | Actinobacteria        | Actinobacteridae  | Actinomycetales      | Micrococccineae     | Dermabacteraceae      |
| <i>Kytococcus sedentarius</i> 541                                          | Bacteria | Actinobacteria      | Actinobacteria        | Actinobacteridae  | Actinomycetales      | Micrococccineae     | Dermabacteraceae      |
| <i>Jonesia denitrificans</i> 55134                                         | Bacteria | Actinobacteria      | Actinobacteria        | Actinobacteridae  | Actinomycetales      | Micrococccineae     | Jonesiaceae           |
| <i>Xylanimonas cellulolytica</i> XL07                                      | Bacteria | Actinobacteria      | Actinobacteria        | Actinobacteridae  | Actinomycetales      | Micrococccineae     | Promicromonosporaceae |
| <i>Sanguibacter keddjei</i> ST-74                                          | Bacteria | Actinobacteria      | Actinobacteria        | Actinobacteridae  | Actinomycetales      | Micrococccineae     | Sanguibacteraceae     |
| <i>Kribbella flavida</i> SW-125                                            | Bacteria | Actinobacteria      | Actinobacteria        | Actinobacteridae  | Actinomycetales      | Propionibacterineae | Nocardiodiaceae       |
| <i>Actinosynnema mirum</i> 101                                             | Bacteria | Actinobacteria      | Actinobacteria        | Actinobacteridae  | Actinomycetales      | Actinosynnemataceae | Actinosynnemataceae   |
| <i>Saccharomonospora viridis</i> P101                                      | Bacteria | Actinobacteria      | Actinobacteria        | Actinobacteridae  | Actinomycetales      | Pseudonocardineae   | Pseudonocardaceae     |
| <i>Thermobispora bispora</i> R51                                           | Bacteria | Actinobacteria      | Actinobacteria        | Actinobacteridae  | Actinomycetales      | Pseudonocardineae   | Pseudonocardaceae     |
| <i>Nocardopsis dassonvillei</i> subsp. <i>dassonvillei</i>                 | Bacteria | Actinobacteria      | Actinobacteria        | Actinobacteridae  | Actinomycetales      | Streptosporangineae | Nocardopsaceae        |
| <i>Streptosporangium roseum</i> NI 9100                                    | Bacteria | Actinobacteria      | Actinobacteria        | Actinobacteridae  | Actinomycetales      | Streptosporangineae | Streptosporangiaceae  |
| <i>Thermomonospora curvata</i> B9                                          | Bacteria | Actinobacteria      | Actinobacteria        | Actinobacteridae  | Actinomycetales      | Streptosporangineae | Thermomonosporaceae   |
| <i>Atopobium parvulum</i> IPP 1246                                         | Bacteria | Actinobacteria      | Actinobacteria        | Coriobacteridae   | Coriobacteriales     | Coriobacterineae    | Coriobacteriaceae     |
| <i>Cryptobacterium curium</i> 12-3                                         | Bacteria | Actinobacteria      | Actinobacteria        | Coriobacteridae   | Coriobacteriales     | Coriobacterineae    | Coriobacteriaceae     |
| <i>Eggerthella lenta</i> VPI 0255                                          | Bacteria | Actinobacteria      | Actinobacteria        | Coriobacteridae   | Coriobacteriales     | Coriobacterineae    | Coriobacteriaceae     |
| <i>Slackia heliotrinireducens</i> RHS 1                                    | Bacteria | Actinobacteria      | Actinobacteria        | Coriobacteridae   | Coriobacteriales     | Coriobacterineae    | Coriobacteriaceae     |
| <i>Conexibacter woeselii</i> ID 131577                                     | Bacteria | Actinobacteria      | Actinobacteria        | Rubrobacteridae   | Solirubrobacteriales | -                   | Conexibacteraceae     |
| <i>Capnocytophaga ochracea</i> VPI 2845                                    | Bacteria | Bacteroidetes       | Flavobacteria         | -                 | Flavobacteriales     | -                   | Flavobacteriaceae     |
| <i>Chitinophaga pinensis</i>                                               | Bacteria | Bacteroidetes       | Sphingobacteria       | -                 | "Sphingobacteriales" | -                   | Chitinophagaceae      |
| <i>Dyadobacter fermentans</i> NS 114                                       | Bacteria | Bacteroidetes       | Sphingobacteria       | -                 | "Sphingobacteriales" | -                   | Cytophagaceae         |
| <i>Spirosoma linguale</i> Claus 1                                          | Bacteria | Bacteroidetes       | Sphingobacteria       | -                 | "Sphingobacteriales" | -                   | Cytophagaceae         |
| <i>Rhodothermus marinus</i> R-10                                           | Bacteria | Bacteroidetes       | Sphingobacteria       | -                 | "Sphingobacteriales" | -                   | Rhodothermaceae       |
| <i>Pedobacter heparinus</i> HIM 762-3                                      | Bacteria | Bacteroidetes       | Sphingobacteria       | -                 | "Sphingobacteriales" | -                   | Sphingobacteriaceae   |
| <i>Sphaerobacter thermophilus</i> S 6022                                   | Bacteria | Chloroflexi         | Thermomicrobia        | Sphaerobacteridae | "Sphaerobacteriales" | Sphaerobacterineae  | Sphaerobacteraceae    |
| <i>Thermobaculum terrenum</i> YNP1                                         | Bacteria | Chloroflexi         | Thermomicrobia        | -                 | Thermomicrobiales    | -                   | Thermomicrobiaceae    |
| <i>Denitrovibrio acetiphilus</i> N2460                                     | Bacteria | Deferribacteres     | Deferribacteres       | -                 | Deferribacterales    | -                   | Deferribacteraceae    |
| <i>Meiothermus ruber</i> 21                                                | Bacteria | Deinococcus-Thermus | Deinococci            | -                 | Thermales            | -                   | Thermaceae            |
| <i>Meiothermus sivanus</i> V1-R2                                           | Bacteria | Deinococcus-Thermus | Deinococci            | -                 | Thermales            | -                   | Thermaceae            |
| <i>Alicyclobacillus acidocaldarius</i> subsp. <i>acidocaldarius</i> 104-1A | Bacteria | Firmicutes          | Bacilli               | -                 | Bacillales           | -                   | Alicyclobacillaceae   |
| <i>Desulfotomaculum acetoxidans</i> 5575                                   | Bacteria | Firmicutes          | Clostridia            | -                 | Clostridiales        | -                   | Peptococcaceae        |
| <i>Anaerococcus prevotii</i> PC 1                                          | Bacteria | Firmicutes          | Clostridia            | -                 | Clostridiales        | -                   | Peptostreptococcaceae |
| <i>Veillonella parvula</i> Te3                                             | Bacteria | Firmicutes          | Clostridia            | -                 | Clostridiales        | -                   | Veillonellaceae       |
| <i>Leptotrichia buccalis</i> C-1013-b                                      | Bacteria | Fusobacteria        | Fusobacteria          | -                 | Fusobacteriales      | -                   | Leptotrichiaceae      |
| <i>Sebadella termitidis</i>                                                | Bacteria | Fusobacteria        | Fusobacteria          | -                 | Fusobacteriales      | -                   | Leptotrichiaceae      |
| <i>Streptobacillus moniliformis</i> 9901                                   | Bacteria | Fusobacteria        | Fusobacteria          | -                 | Fusobacteriales      | -                   | Leptotrichiaceae      |
| <i>Planctomyces limnophilus</i> 290                                        | Bacteria | Planctomycetes      | Planctomycea          | -                 | Planctomycetales     | -                   | Planctomycetaceae     |
| <i>Desulfohalobium rethaense</i> HR 100                                    | Bacteria | Proteobacteria      | Deltaproteobacteria   | -                 | Desulfovibrionales   | -                   | Desulfohalobaceae     |
| <i>Desulfomicrobium baculatum</i> X                                        | Bacteria | Proteobacteria      | Deltaproteobacteria   | -                 | Desulfovibrionales   | -                   | Desulfomicrobiaceae   |
| <i>Haliangium ochraceum</i> SMP-2                                          | Bacteria | Proteobacteria      | Deltaproteobacteria   | -                 | Myxococcales         | Nannocystineae      | Haliangiaceae         |
| <i>Sulfurospirillum deleyianum</i> 5175                                    | Bacteria | Proteobacteria      | Epsilonproteobacteria | -                 | Campylobacteriales   | -                   | Campylobacteraceae    |
| <i>Kangiella koreensis</i> SW-125                                          | Bacteria | Proteobacteria      | Gammaproteobacteria   | -                 | Oceanospirillales    | -                   | Incertae sedis        |
| <i>Brachyspira murdochii</i> 56-150                                        | Bacteria | Spirochaetes        | Spirochaetes          | -                 | Spirochaetales       | -                   | Brachyspiraceae       |
| <i>Dethiosulfobivrio peptidovorans</i> SEBR 4207                           | Bacteria | Synergistetes       | Synergistia           | -                 | Synergistales        | -                   | Synergistaceae        |
| <i>Thermanaerovibrio acidaminovorans</i> Su883                             | Bacteria | Synergistetes       | Synergistia           | -                 | Synergistales        | -                   | Synergistaceae        |

**Table S1 B.** Characteristics of the organisms in the GEBA pilot project and their genomes.

| Name                                                                       | Collection ID | Number of replicons | G+C(%) | Genome Size (bp) | protein coding genes | RNA genes | 16S | CRISPR | Optimum growth temperature | O <sub>2</sub> requirements | Motility  | Habitat                   |
|----------------------------------------------------------------------------|---------------|---------------------|--------|------------------|----------------------|-----------|-----|--------|----------------------------|-----------------------------|-----------|---------------------------|
| <i>Halogeometricum borinquense</i> PR3                                     | DSM 11551     | 6                   | 59.94  | 3,944,467        | 3937                 | 57        | 2   | 1      | 40°C                       | aerobe                      | motile    | solar saltern             |
| <i>Halomicrobium mukohataei</i> arg-2                                      | DSM 12286     | 2                   | 65.53  | 3,332,349        | 3475                 | 59        | 3   | 2      | 45°C                       | fac. anaerobe               | motile    | salt marsh, soil          |
| <i>Halorhabdus utahensis</i> AX-2                                          | DSM 12940     | 1                   | 62.90  | 3,116,795        | 3027                 | 49        | 1   | 2      | 50°C                       | aerobe                      | motile    | salt lake sediment        |
| <i>Acidimicrobium ferrooxidans</i> ICP                                     | DSM 10331     | 1                   | 68.29  | 2,158,157        | 2038                 | 54        | 2   | 2      | 45°C                       | aerobe                      | motile    | hot spring                |
| <i>Catenullispora acidiphila</i> ID 139908                                 | DSM 44928     | 1                   | 66.77  | 10,467,782       | 9056                 | 69        | 3   | 4      | 22-28°C                    | aerobe                      | nonmotile | soil                      |
| <i>Gordonia bronchialis</i> Tsukamura 3410                                 | DSM 43247     | n.d.                | 67.05  | draft 5.3 Mb     | 5167                 | 65        | 6   | 0      | 28°C                       | aerobe                      | nonmotile | human pathogen            |
| <i>Tsukamurella paurometabola</i>                                          | DSM 20162     | n.d.                | 68.39  | draft 4.5 Mb     | 4423                 | 65        | 2   | 0      | 10-35°C                    | aerobe                      | nonmotile | soil, sludge              |
| <i>Geodermatophilus obscurus</i> G-20                                      | DSM 43160     | n.d.                | 73.99  | draft 5.3 Mb     | 5283                 | 71        | 3   | 0      | 28°C                       | aerobe                      | nonmotile | soil, desert              |
| <i>Nakamurella multipartita</i> Y-104                                      | DSM 44233     | n.d.                | 70.90  | draft 6.0 Mb     | 5594                 | 64        | 2   | 10     | 28°C                       | aerobe                      | nonmotile | sludge                    |
| <i>Staeckbrandtia nassauensis</i> LLR-40K-21                               | DSM 44728     | n.d.                | 68.14  | draft 6.8 Mb     | 6568                 | 53        | 2   | 3      | 28°C                       | aerobe                      | nonmotile | soil                      |
| <i>Beutenbergia cavernae</i> HK1 0122                                      | DSM 12333     | 1                   | 73.12  | 4,669,183        | 4225                 | 53        | 2   | 1      | 28°C                       | aerobe                      | nonmotile | soil                      |
| <i>Cellulomonas flavigena</i> 134                                          | DSM 20109     | n.d.                | 74.14  | draft 4.0 Mb     | 3755                 | 52        | 4   | 0      | 30°C                       | aerobe                      | motile    | soil                      |
| <i>Brachy bacterium faecium</i> Scheffler 6-10                             | DSM 4810      | 1                   | 72.05  | 3,614,992        | 3129                 | 69        | 3   | 0      | 25-30 °C                   | aerobe                      | nonmotile | soil                      |
| <i>Kytococcus sedentarius</i> 541                                          | DSM 20547     | 1                   | 71.63  | 2,785,024        | 2639                 | 64        | 2   | 0      | 28-36 °C                   | aerobe                      | nonmotile | skin flora & marine       |
| <i>Jonesia denitrificans</i> 55134                                         | DSM 20603     | 1                   | 58.42  | 2,749,646        | 2558                 | 77        | 5   | 0      | 37 °C                      | fac. anaerobe               | motile    | ox blood                  |
| <i>Xylanimonas cellulositica</i> XIL07                                     | DSM 15894     | 2                   | 72.45  | 3,831,380        | 3485                 | 61        | 3   | 0      | 28 °C                      | aerobe                      | nonmotile | soil                      |
| <i>Sanguibacter keddii</i> ST-74                                           | DSM 10542     | 1                   | 71.89  | 4,253,413        | 4735                 | 70        | 4   | 0      | 25-30 °C                   | fac. anaerobe               | motile    | bovine blood              |
| <i>Kribbella flavida</i> SW-125                                            | DSM 17836     | n.d.                | 70.57  | draft 7.6 Mb     | 7262                 | 59        | 2   | 0      | 28 °C                      | aerobe                      | nonmotile | soil                      |
| <i>Actinosynnema mirum</i> 101                                             | DSM 43827     | 1                   | 73.71  | 8,248,144        | 7100                 | 77        | 5   | 0      | 28 °C                      | aerobe                      | nonmotile | soil                      |
| <i>Saccharomonospora viridis</i> P101                                      | DSM 43017     | 1                   | 67.32  | 4,308,349        | 3906                 | 64        | 3   | 9      | 45 °C                      | aerobe                      | nonmotile | soil                      |
| <i>Thermobispora bispora</i> R51                                           | DSM 43833     | 1                   | 72.43  | 4,189,976        | 3596                 | 63        | 4   | 0      | 55-65 °C                   | aerobe                      | nonmotile | rotten mixed manure       |
| <i>Nocardioopsis dassonvillei</i> subsp. <i>dassonvillei</i>               | DSM 43111     | n.d.                | 72.74  | draft 6.5 Mb     | 5634                 | 72        | 5   | 8      | 28 °C                      | aerobe                      | nonmotile | blood                     |
| <i>Streptosporangium roseum</i> NI 9100                                    | DSM 43021     | n.d.                | 70.77  | draft 10.1 Mb    | 9430                 | 76        | 7   | 0      | 28 °C                      | aerobe                      | nonmotile | soil                      |
| <i>Thermomonospora curvata</i> B9                                          | DSM 43183     | n.d.                | 71.56  | draft 5.6 Mb     | 5047                 | 86        | 3   | 13     | 50 °C                      | aerobe                      | nonmotile | mixed manure              |
| <i>Atopobium parvulum</i> IPP 1246                                         | DSM 20469     | 1                   | 45.69  | 1,543,805        | 1369                 | 50        | 1   | 0      | 37 °C                      | anaerobe                    | nonmotile | oral microflora           |
| <i>Cryptobacterium curtum</i> 12-3                                         | DSM 15641     | 1                   | 50.91  | 1,617,804        | 1364                 | 58        | 3   | 0      | 37 °C                      | obl. anaerobe               | nonmotile | oral microflora           |
| <i>Eggerthella lenta</i> VPI 0255                                          | DSM 2243      | 1                   | 64.20  | 3,632,260        | 3123                 | 58        | 3   | 1      | 37 °C                      | anaerobe                    | nonmotile | intestinal microflora     |
| <i>Slackia heliotrinireducens</i> RHS 1                                    | DSM 20476     | 1                   | 60.21  | 3,165,038        | 2798                 | 58        | 2   | 0      | 37 °C                      | anaerobe                    | nonmotile | sheep rumen               |
| <i>Conexibacter woeseii</i> LD 131577                                      | DSM 14684     | n.d.                | 72.63  | draft 6.3 Mb     | 5979                 | 47        | 1   | 0      | 28 °C                      | aerobe                      | motile    | soil                      |
| <i>Capnocytophaga ochracea</i> VPI 2845                                    | DSM 7271      | 1                   | 39.59  | 2,612,925        | 2193                 | 59        | 4   | 1      | 36 °C                      | fac. anaerobe               | gliding   | oral microflora           |
| <i>Chitinophaga pinensis</i>                                               | DSM 2588      | 1                   | 45.23  | 9,127,347        | 7302                 | 95        | 6   | 0      | 23 °C                      | aerobe                      | motile    | pine litter               |
| <i>Dyadobacter fermentans</i> NS 114                                       | DSM 18053     | 1                   | 51.54  | 6,967,790        | 5804                 | 50        | 4   | 0      | 28-35 °C                   | aerobe                      | nonmotile | soil, Zea mays            |
| <i>Spirosoma linguale</i> Claus 1                                          | DSM 74        | n.d.                | 50.12  | draft 8.5 Mb     | 3550                 | 52        | 1   | 1      | 20-30 °C                   | aerobe                      | motile    | soil, fresh water         |
| <i>Rhodothermus marinus</i> R-10                                           | DSM 4252      | 2                   | 64.30  | 3,386,737        | 2914                 | 48        | 1   | 10     | 65-80 °C                   | aerobe                      | nonmotile | marine, hot spring        |
| <i>Pedobacter heparinus</i> HIM 762-3                                      | DSM 2366      | 1                   | 42.05  | 5,167,383        | 4287                 | 57        | 3   | 0      | 25-30 °C                   | aerobe                      | motile    | soil                      |
| <i>Sphaerobacter thermophilus</i> S 6022                                   | DSM 20745     | n.d.                | 68.11  | 3,988,823        | 3550                 | 52        | 1   | 1      | 55 °C                      | aerobe                      | nonmotile | sludge                    |
| <i>Thermobaculum terrenum</i> YNP1                                         | ATCC BAA-798  | 2                   | 53.51  | 3,101,581        | 2872                 | 58        | 2   | 0      | 65-92 °C                   | aerobe                      | nonmotile | soil                      |
| <i>Denitrovibrio acetiphilus</i> N2460                                     | DSM 12809     | n.d.                | 42.51  | draft 3.2 Mb     | 3183                 | 51        | 1   | 0      | 36 °C                      | anaerobe                    | motile    | marine and fresh water    |
| <i>Meiothermus ruber</i> 21                                                | DSM 1279      | 1                   | 63.38  | 3,097,457        | 3052                 | 53        | 2   | 0      | 60 °C                      | aerobe                      | nonmotile | hot spring                |
| <i>Meiothermus silvanus</i> VI-R2                                          | DSM 9946      | n.d.                | 62.66  | draft 3.7 Mb     | 3624                 | 64        | 2   | 8      | 50 °C                      | aerobe                      | nonmotile | hot spring                |
| <i>Alicyclobacillus acidocaldarius</i> subsp. <i>acidocaldarius</i> 104-1A | DSM 446       | n.d.                | 62.08  | draft 3.1 Mb     | 3110                 | 97        | 3   | 4      | 55 °C                      | aerobe                      | nonmotile | hot spring                |
| <i>Desulfotomaculum acetoxidans</i> 5575                                   | DSM 771       | 1                   | 41.55  | 4,545,624        | 4370                 | 100       | 10  | 0      | 37 °C                      | obl. anaerobe               | motile    | divers                    |
| <i>Anaerococcus prevotii</i> PC 1                                          | DSM 20548     | 2                   | 35.64  | 1,998,633        | 1852                 | 61        | 4   | 0      | 37 °C                      | anaerobe                    | nonmotile | human microflora          |
| <i>Veillonella parvula</i> Te3                                             | DSM 2008      | 1                   | 38.63  | 2,132,142        | 1859                 | 61        | 4   | 0      | 37 °C                      | anaerobe                    | nonmotile | human microflora          |
| <i>Leptotrichia buccalis</i> C-1013-b                                      | DSM 11135     | 1                   | 29.65  | 2,465,610        | 2306                 | 61        | 5   | 4      | 37 °C                      | anaerobe                    | nonmotile | blood, oral microflora    |
| <i>Sebalidella termitidis</i>                                              | ATCC 33386    | n.d.                | 33.35  | draft 4.5 Mb     | 4633                 | 55        | 2   | 1      | mesophile                  | anaerobe                    | nonmotile | termite intestine         |
| <i>Sireptobacillus moniliformis</i> 9901                                   | DSM 12112     | 2                   | 26.28  | 1,673,280        | 1511                 | 55        | 5   | 0      | mesophile                  | fac. anaerobe               | nonmotile | human                     |
| <i>Planctomyces limophilus</i> 290                                         | DSM 3776      | 2                   | 54.68  | 5,460,085        | 4304                 | 66        | 2   | 1      | mesophile                  | aerobe                      | motile    | marine and fresh water    |
| <i>Desulfohalobium retbaense</i> HR 100                                    | DSM 5692      | n.d.                | 57.29  | draft 2.9 Mb     | 2638                 | 62        | 2   | 2      | 35 °C                      | anaerobe                    | motile    | saline lake sediment      |
| <i>Desulfomicrobium baculatum</i> X                                        | DSM 4028      | 1                   | 58.65  | 3,942,657        | 3494                 | 72        | 2   | 0      | 30 °C                      | anaerobe                    | motile    | fresh water/anoxic sedim. |
| <i>Haliangium ochraceum</i> SMP-2                                          | DSM 14365     | n.d.                | 69.49  | draft 9.4 Mb     | 7063                 | 52        | 2   | 5      | 30-34 °C                   | aerobe                      | gliding   | coastal sands             |
| <i>Sulfurospirillum deleyianum</i> 5175                                    | DSM 6946      | n.d.                | 38.96  | draft 2.3 Mb     | 2412                 | 49        | 2   | 6      | 20-36 °C                   | anaerobe                    | motile    | anoxic mud                |
| <i>Kangiella koreensis</i> SW-125                                          | DSM 16069     | 1                   | 43.69  | 2,852,073        | 2647                 | 48        | 2   | 0      | 30-37 °C                   | fac. anaerobe               | nonmotile | marine                    |
| <i>Brachyspira murdochii</i> 56-150                                        | DSM 12563     | n.d.                | 27.74  | draft 3.2 Mb     | 3016                 | 42        | 1   | 1      | 37°C                       | fac. anaerobe               | motile    | intestinal microflora     |
| <i>Dethiosulfobivrio peptidovorans</i> SEBR 4207                           | DSM 11002     | 3                   | 54.42  | 2,576,359        | 2458                 | 59        | 5   | 2      | 42 °C                      | obl. anaerobe               | motile    | oil fields                |
| <i>Thermanaerovibrio acidaminovorans</i> Su883                             | DSM 6589      | 1                   | 63.79  | 1,848,474        | 1765                 | 60        | 3   | 0      | 55 °C                      | obl. anaerobe               | motile    | sludge                    |

obl. =obligate, obligate anaerobes will die when exposed to atmospheric levels of oxygen;

fac. = facultative, facultative anaerobes can use oxygen when present.

All numbers (e.g., number of replicons or genome size) are values as of time of submission of the paper.



Table S1 C. Cell growth condition and DNA preparation for the GEBA pilot project.

| Species and strain                                          | Cell mass production  |       |           | gDNA isolation |                 |                  | DSM ID |
|-------------------------------------------------------------|-----------------------|-------|-----------|----------------|-----------------|------------------|--------|
|                                                             | Medium                | Temp. | Oxygen    | Cell lysis     | Incubation      | DNA purification |        |
| <i>Halogeometricum boringuense</i> PR3                      | DSMZ 372              | 35°C  | aerobic   | st/LALMP       | 1 hour, 37°C    | QIAGEN           | 11551  |
| <i>Halomicrobium mukohataei</i> arg-2                       | DSMZ 372              | 35°C  | aerobic   | st/L           | 1 hour, 37°C    | QIAGEN           | 12286  |
| <i>Halorhabdus utahensis</i> AX-2                           | DSMZ 927              | 40°C  | aerobic   | standard       | overnight, 35°C | QIAGEN           | 12940  |
| <i>Acidimicrobium ferrooxidans</i> ICP                      | DSMZ 709              | 45°C  | aerobic   | st/L           | 1 hour, 37°C    | QIAGEN           | 10331  |
| <i>Catenulispora acidiphila</i> ID 139908                   | DSMZ 65               | 28°C  | aerobic   | st/ALM         | overnight, 35°C | JGI CTAP         | 44928  |
| <i>Gordonia bronchialis</i> Tsukamura 3410                  | DSMZ 535              | 28°C  | aerobic   | st/LALMP       | overnight, 35°C | QIAGEN           | 43247  |
| <i>Tsakumurella paurometabola</i>                           | DSMZ 535              | 30°C  | aerobic   | st/LALMice     | 1 hour, 37°C    | MasterPure       | 20162  |
| <i>Geodermatophilus obscurus</i> G-20                       | DSMZ 65               | 28°C  | aerobic   | st/LALMP       | overnight, 35°C | QIAGEN           | 43160  |
| <i>Nakamurella multipartita</i> Y-104                       | DSMZ 553              | 28°C  | aerobic   | st/FT          | overnight, 35°C | QIAGEN           | 44233  |
| <i>Stackebrandtia nassauensis</i> LLR-40K-21                | DSMZ 553              | 28°C  | aerobic   | st/DALM        | 1 hour, 37°C    | QIAGEN           | 44728  |
| <i>Beutenbergia cavernae</i> HKI 0122                       | DSMZ 736              | 28°C  | aerobic   | st/FT          | overnight, 35°C | QIAGEN           | 12333  |
| <i>Cellulomonas flavigena</i> 134                           | DSMZ 53               | 30°C  | aerobic   | standard       | 30 min., 37°C   | QIAGEN           | 20109  |
| <i>Brachybacterium faecium</i> Schefflerle 6-10             | DSMZ 92               | 28°C  | aerobic   | standard       | 30 min., 37°C   | QIAGEN           | 4810   |
| <i>Kytococcus sedentarius</i> 541                           | DSMZ 92               | 30°C  | aerobic   | st/FT          | overnight, 35°C | QIAGEN           | 20547  |
| <i>Jonesia denitrificans</i> 55134                          | DSMZ 215              | 37°C  | aerobic   | st/ALM         | overnight, 35°C | JGI CTAP         | 20603  |
| <i>Xylanimonas cellulolytica</i> XIL07                      | DSMZ 92               | 28°C  | aerobic   | standard       | 30 min., 37°C   | QIAGEN           | 15894  |
| <i>Sanguibacter keddietii</i> ST-74                         | DSMZ 92               | 30°C  | aerobic   | standard       | 1 hour, 37°C    | QIAGEN           | 10542  |
| <i>Kribbella flavida</i> SW-125                             | DSMZ 830              | 28°C  | aerobic   | st/FT          | overnight, 35°C | QIAGEN           | 17836  |
| <i>Actinosynnema mirum</i> 101                              | DSMZ 535              | 28°C  | aerobic   | st/DALM        | 1 hour, 37°C    | QIAGEN           | 43827  |
| <i>Saccharomonospora viridis</i> P101                       | DSMZ 535              | 45°C  | aerobic   | st/FT          | overnight, 35°C | QIAGEN           | 43017  |
| <i>Thermobispora bispora</i> R51                            | DSMZ 65               | 55°C  | aerobic   | st/FT          | overnight, 35°C | QIAGEN           | 43833  |
| <i>Nocardiopsis dassonvillei</i> subsp. <i>dassonvillei</i> | DSMZ 535              | 28°C  | aerobic   | st/DALM        | 30 min., 37°C   | QIAGEN           | 43111  |
| <i>Streptosporangium roseum</i> NI 9100                     | DSMZ 535              | 28°C  | aerobic   | st/ALM         | overnight, 35°C | JGI CTAP         | 43021  |
| <i>Thermomonospora curvata</i> B9                           | DSMZ 553              | 45°C  | aerobic   | st/LALM        | 4 hours, 37°C   | MasterPure       | 43183  |
| <i>Atopobium parvulum</i> IPP 1246                          | DSMZ 104              | 37°C  | anaerobic | st/ALM         | overnight, 35°C | JGI CTAP         | 20469  |
| <i>Cryptobacterium curtum</i> 12-3                          | DSMZ 78               | 37°C  | anaerobic | st/FT          | overnight, 35°C | QIAGEN           | 15641  |
| <i>Eggerthella lenta</i> VPI 0255                           | DSMZ 209              | 37°C  | anaerobic | standard       | 30 min., 37°C   | QIAGEN           | 2243   |
| <i>Slackia heliotrinireducens</i> RHS 1                     | DSMZ 104              | 37°C  | anaerobic | st/FT          | overnight, 35°C | QIAGEN           | 20476  |
| <i>Conexibacter woesei</i> ID 131577                        | DSMZ 92               | 28°C  | aerobic   | st/FT          | overnight, 35°C | QIAGEN           | 14684  |
| <i>Capnocytophaga ochracea</i> VPI 2845                     | DSMZ 340              | 37°C  | anaerobic | st/L           | 1 hour, 37°C    | QIAGEN           | 7271   |
| <i>Chitinophaga pinensis</i>                                | DSMZ 67               | 22°C  | aerobic   | st/LALMP       | overnight, 35°C | QIAGEN           | 2588   |
| <i>Dyadobacter fermentans</i> NS 114                        | DSMZ 830              | 28°C  | aerobic   | st/FT          | overnight, 35°C | QIAGEN           | 18053  |
| <i>Spirosoma linguale</i> Claus 1                           | DSMZ 7                | 28°C  | aerobic   | st/L           | 1 hour, 37°C    | QIAGEN           | 74     |
| <i>Rhodothermus marinus</i> R-10                            | DSMZ 630              | 65°C  | aerobic   | st/LALMP       | overnight, 35°C | QIAGEN           | 4252   |
| <i>Pedobacter heparinus</i> HIM 762-3                       | DSMZ 1                | 25°C  | aerobic   | st/LALMP       | overnight, 35°C | QIAGEN           | 2366   |
| <i>Sphaerobacter thermophilus</i> S 6022                    | DSMZ 467              | 55°C  | aerobic   | st/FT          | overnight, 35°C | QIAGEN           | 20745  |
| <i>Thermobaculum terrenum</i> YNPI                          | ATCC 1981             | 55°C  | aerobic   | -              | -               | -                | -      |
| <i>Denitrovibrio acetiphilus</i> N2460                      | DSMZ 881 <sup>†</sup> | 30°C  | anaerobic | st/L           | 30 min., 37°C   | QIAGEN           | 12809  |
| <i>Meiothermus ruber</i> 21                                 | DSMZ 256              | 50°C  | aerobic   | st/L           | 1 hour, 37°C    | QIAGEN           | 1279   |
| <i>Meiothermus silvanus</i> VI-R2                           | DSMZ 86               | 50°C  | aerobic   | st/LALMP       | overnight, 35°C | QIAGEN           | 9946   |
| <i>Alicyclobacillus acidocaldarius</i> subsp.               | DSMZ 402              | 60°C  | aerobic   | st/L           | 1 hour, 37°C    | QIAGEN           | 446    |
| <i>Desulfotomaculum acetoxidans</i> 5575                    | DSMZ 124              | 37°C  | anaerobic | st/LALMP       | overnight, 35°C | QIAGEN           | 771    |
| <i>Anaerococcus prevotii</i> PC 1                           | DSMZ 104              | 37°C  | anaerobic | st/LALMP       | overnight, 35°C | QIAGEN           | 20548  |
| <i>Veillonella parvula</i> Te3                              | DSMZ 104              | 37°C  | anaerobic | st/L           | 1 hour, 37°C    | QIAGEN           | 2008   |
| <i>Leptotrichia buccalis</i> C-1013-b                       | DSMZ 104              | 37°C  | anaerobic | st/L           | 1 hour, 37°C    | QIAGEN           | 1135   |
| <i>Sebaldeella termitidis</i>                               | ATCC 1490             | 37°C  | anaerobic | unknown        | -               | -                | -      |
| <i>Streptobacillus moniliformis</i> 9901                    | DSMZ 429              | 37°C  | aerobic   | st/L           | 1 hour, 37°C    | QIAGEN           | 12112  |
| <i>Planctomyces limnophilus</i> 290                         | DSMZ 621              | 28°C  | aerobic   | standard       | 1 hour, 37°C    | QIAGEN           | 3776   |
| <i>Desulfotomaculum rebaense</i> HR 100                     | DSMZ 499              | 35°C  | anaerobic | standard       | 30 min., 37°C   | QIAGEN           | 5692   |
| <i>Desulfomicrobium baculatum</i> X                         | DSMZ 63               | 30°C  | anaerobic | st/LALMP       | overnight, 35°C | QIAGEN           | 4028   |
| <i>Haliangium ochraceum</i> SMP-2                           | DSMZ 958 <sup>†</sup> | 30°C  | aerobic   | st/LALMP       | overnight, 35°C | QIAGEN           | 14365  |
| <i>Sulfurospirillum deleyianum</i> 5175                     | DSMZ 541              | 29°C  | anaerobic | st/L           | 30 min., 37°C   | QIAGEN           | 6946   |
| <i>Kangiaella koreensis</i> SW-125                          | DSMZ 514              | 28°C  | aerobic   | st/L           | 1 hour, 37°C    | QIAGEN           | 16069  |
| <i>Brachyspira murdochii</i> 56-150                         | DSMZ 840              | 37°C  | anaerobic | st/L           | 30 min., 37°C   | QIAGEN           | 12563  |
| <i>Dethiosulfobrevibacter peptidovorans</i> SEBR 4207       | DSMZ 786              | 42°C  | anaerobic | st/FT          | overnight, 35°C | QIAGEN           | 11002  |
| <i>Thermanaerobrevibacter acidaminovorans</i> Su883         | DSMZ 104              | 55°C  | anaerobic | standard       | 30 min., 37°C   | QIAGEN           | 6589   |

Medium additions: <sup>†</sup>1% R2A-medium; <sup>†</sup>yeast cell paste was replaced by 3 g/l casitone and 1 g/l yeast extract

#### cell lysis procedures (modification):

- **standard (st)** following standard procedures (as described in original literature or in supplier's manual)
- **st / L** add additional 200 µl lysozyme to standard lysis solution
- **st / ALM** add 500 µl achromopeptidase, lysostaphin, mutanolysin, each, to standard lysis solution
- **st / DALM** add 1000 µl achromopeptidase, 500 µl lysostaphin, 500 µl mutanolysin to standard lysis solution
- **st / LALMP** add additional 100 µl lysozyme; 500 µl achromopeptidase, lysostaphin, mutanolysin, each, to standard lysis solution, reduce proteinase K to 160µl, only
- **st / LALM** add additional 1 µl lysozyme; 5 µl mutanolysin, achromopeptidase, lysostaphine, each, to standard lysis solution
- **st / LALMice** add additional 4 µl lysozyme; 5 µl mutanolysin, achromopeptidase, lysostaphine, each, to standard lysis solution; after MPC-Step incubate 1hour on ice (extra step)
- **st / FT** freeze 20 min. (-70°C), heat 5 min. (98°C), cool 15 min. to 37°C; add 1.5 ml lysozyme (standard: 0.3 ml, only), 1.0 ml achromopeptidase, 0.12 ml lysostaphine, 0.12 ml mutanolysine, 1.5 ml proteinase K (standard: 0.5 ml, only)

#### DNA purification

- JGI CTAP: [www.jgi.doe.gov](http://www.jgi.doe.gov)
- QIAGEN: Qiagen Genomic 500 Kit (Qiagen 10262)
- MasterPure: MasterPure Gram Positive DNA Purification Kit (Epicentre MGP04100)

Table S2. Summary of sequencing status of the GEBA pilot project

| Organism                                         | IMG-ID     | NCBI-PID | Culture-ID   | GOLD-ID | Sanger Libraries | Sequencing Platform | Assembler | Gene Calling Method | Sequencing Status |
|--------------------------------------------------|------------|----------|--------------|---------|------------------|---------------------|-----------|---------------------|-------------------|
| <i>Acidimicrobium ferrooxidans</i> ICP           | 2500645360 | 29525    | DSM 10331    | GI02326 | 8kb              | 454/Sanger          | Arachne   | GeneMark            | Complete          |
| <i>Actinosynnema mirum</i> 101                   | 2500395345 | 19705    | DSM 43827    | GI02064 | 8kb/40kb         | 454/Sanger          | Arachne   | GeneMark            | Complete          |
| <i>Alicyclobacillus acidocaldarius</i> 104-1A    | 2500575013 | 29405    | DSM 446      | GI02324 | 8kb              | 454/Sanger          | PGA       | GeneMark            | Complete          |
| <i>Anaerococcus prevotii</i> PC 1                | 2500645363 | 29533    | DSM 20548    | GI02318 | 8kb              | 454/Sanger          | PGA       | GeneMark            | Complete          |
| <i>Atopobium parvulum</i> IPP 1246               | 2500575011 | 29401    | DSM 20469    | GI02317 | 8kb/40kb         | 454/Sanger          | phrap     | GeneMark            | Complete          |
| <i>Beutenbergia cavernosa</i> HKI 0122           | 2500395322 | 20827    | DSM 12333    | GI02225 | 8kb/40kb         | 454/Sanger          | PGA       | GeneMark            | Complete          |
| <i>Brachy bacterium faecium</i> Scheffele 6-10   |            |          |              |         |                  |                     |           |                     |                   |
| <i>Brachyspira murchisonii</i> 56-150            | 250064536  | 29543    | DSM 12563    | GI023   | 8kb/40k          | 454/Sanger          | PGA       | GeneMark            | Draft             |
| <i>Capnocytophaga ochracea</i> VPI 2845          | 2500575005 | 29403    | DSM 7271     | GI023   | 8kb/40k          | 454/Sanger          | PGA       | GeneMark            | Complete          |
| <i>Catenulipora acidiphila</i> ID139908          | 2500395338 | 21085    | DSM 44928    | GI02233 | 8kb/40kb         | Sanger              | Arachne   | GeneMark            | Complete          |
| <i>Cellulomonas flavigena</i> 134                | 2500395336 | 19707    | DSM 20109    | GI02067 | 8kb/40kb         | Sanger              | Arachne   | GeneMark            | Draft             |
| <i>Chitinophaga pinensis</i> UQM 2034            | 2500395347 | 27951    | DSM 2588     | GI02244 | 8kb/40kb         | 454/Sanger          | PGA       | GeneMark            | Complete          |
| <i>Concixia woesei</i> ID131577                  | 2500347307 | 20745    | DSM 14684    | GI02154 | 8kb/40kb         | 454/Sanger          | PGA       | GeneMark            | Complete          |
| <i>Cryptobacterium curtum</i> 1.2-3              | 2500332002 | 20739    | DSM 15641    | GI02234 | 8kb/40kb         | 454/Sanger          | PGA       | GeneMark            | Complete          |
| <i>Denitrovibrio acetiphilus</i> N2460           | 2500575016 | 29431    | DSM 12809    | GI02322 | 8kb/40kb         | 454/Sanger          | PGA       | GeneMark            | Complete          |
| <i>Desulfalobium reitbaense</i> HR 100           | 250057501  | 29199    | DSM 5692     | GI022   | 8kb/40k          | Sanger              | Arachne   | GeneMark            | Complete          |
| <i>Desulfococcus baculatum</i> Y                 | 2500645356 | 29527    | DSM 4028     | GI02302 | 8kb              | 454/Sanger          | PGA       | GeneMark            | Complete          |
| <i>Desulfotomaculum acetoxidans</i> 5575         | 2500395337 | 27947    | DSM 771      | GI02239 | 8kb/40kb         | Sanger              | PGA       | GeneMark            | Complete          |
| <i>Dehalosulfatobium peptidovorans</i> SEBR 4207 | 2500549401 | 20741    | DSM 11002    | GI02152 | 8kb              | 454/Sanger          | PGA       | GeneMark            | Draft             |
| <i>Dyadobacter fermentans</i> NS 114             | 2500395342 | 20829    | DSM 18053    | GI02155 | 8kb/40kb         | Sanger              | Arachne   | GeneMark            | Complete          |
| <i>Eggerthella lenta</i> VPI 0255                | 2500549402 | 21093    | DSM 2243     | GI02242 | 8kb/40kb         | 454/Sanger          | Arachne   | GeneMark            | Complete          |
| <i>Geodermatophilus obscurus</i> G-20            | 2500645366 | 29547    | DSM 43160    | GI02257 | 8kb              | 454/Sanger          | Arachne   | GeneMark            | Draft             |
| <i>Gordonia bronchialis</i> Tsukamura 3410       |            |          |              |         |                  |                     |           |                     |                   |
| <i>Haliangium ochraceum</i> SMP-2                | 2500395339 | 28711    | DSM 14365    | GI02251 | 8kb/40kb         | 454/Sanger          | Arachne   | GeneMark            | Complete          |
| <i>Halogemotium boringuense</i> PR3              | 2500153400 | 20743    | DSM 11551    | GI02153 | 8kb/40kb         | 454/Sanger          | PGA       | GeneMark            | Complete          |
| <i>Halomicrobium mukohataei</i> arg-2            | 2500395343 | 27945    | DSM 12286    | GI02248 | 8kb/40kb         | 454/Sanger          | PGA       | GeneMark            | Complete          |
| <i>Halorhabdus utahensis</i> AX-2                | 2500575004 | 29305    | DSM 12940    | GI02250 | 8kb/40kb         | 454/Sanger          | PGA       | GeneMark            | Complete          |
| <i>Jonesia denitrificans</i> 55134               | 2500168153 | 20833    | DSM 20603    | GI02227 | 8kb/40kb         | Sanger              | Arachne   | GeneMark            | Complete          |
| <i>Kangiaella koreensis</i> SW-125               | 2500645353 | 29443    | DSM 16069    | GI02314 | 8kb/40kb         | 454/Sanger          | PGA       | GeneMark            | Complete          |
| <i>Kribbella flavida</i> SM-125                  | 250039532  | 21089    | DSM 17836    | GI022   | 8kb/40k          | 454/Sanger          | PGA       | GeneMark            | Complete          |
| <i>Kyococcus sedentarius</i> 541                 | 2500168150 | 21067    | DSM 20547    | GI02226 | 8kb/40kb         | Sanger              | Arachne   | GeneMark            | Complete          |
| <i>Leptotrichia buccalis</i> C-1013-b            | 2500645352 | 29445    | DSM 1135     | GI02240 | 8kb/40kb         | 454/Sanger          | PGA       | GeneMark            | Complete          |
| <i>Meiothermus ruber</i> 541                     | 2500395348 | 28827    | DSM 1279     | GI02300 | 8kb/40kb         | 454/Sanger          | PGA       | GeneMark            | Complete          |
| <i>Meiothermus silvanus</i> VI-12                | 2500645369 | 29551    | DSM 9946     | GI0230  | 8kb/40kb         | 454/Sanger          | Arachne   | GeneMark            | Draft             |
| <i>Nakamurella multipartita</i> Y-104            | 2500645368 | 21081    | DSM 44233    | GI0223  | 8kb/40kb         | Sanger              | Arachne   | GeneMark            | Complete          |
| <i>Nocardopsis dassonvillei</i> dassonvillei     | 2500395320 | 19709    | DSM 43111    | GI02065 | 8kb/40kb         | 454/Sanger          | PGA       | GeneMark            | Draft             |
| <i>Pedobacter heparinus</i> HIM 762-3            | 2500395321 | 27949    | DSM 2366     | GI02243 | 8kb/40kb         | Sanger              | Arachne   | GeneMark            | Complete          |
| <i>Planctomyces limnophilus</i> 290              | 2500575009 | 29411    | DSM 3776     | GI02301 | 8kb              | 454/Sanger          | PGA       | GeneMark            | Complete          |
| <i>Rhodothermus marinus</i> R-10                 | 2500575002 | 29281    | DSM 4252     | GI02303 | 8kb/40kb         | 454/Sanger          | PGA       | GeneMark            | Complete          |
| <i>Saccharomonospora viridis</i> P101            | 2500347305 | 20835    | DSM 43017    | GI02228 | 8kb/40kb         | Sanger              | Arachne   | GeneMark            | Complete          |
| <i>Sanguibacter keddii</i> ST-74                 | 2500153403 | 19711    | DSM 10542    | GI0215  | 8kb              | 454/Sanger          | Arachne   | GeneMark            | Complete          |
| <i>Sebadella termitidis</i>                      | 2500645364 | 29539    | ATCC 33386   | GI02490 | 8kb              | 454/Sanger          | phrap     | GeneMark            | Complete          |
| <i>Shackia heliotrinireducens</i> RHS 1          | 2500168151 | 20831    | DSM 20476    | GI0215  | 8kb/40kb         | 454/Sanger          | PGA       | GeneMark            | Complete          |
| <i>Sphaerobacter thermophilus</i> 4ac11          | 2500347306 | 21087    | DSM 20745    | GI02236 | 8kb/40kb         | 454/Sanger          | PGA       | GeneMark            | Complete          |
| <i>Spirosoma linguale</i> Claus 1                | 250039535  | 28817    | DSM 74       | GI02    | 8kb/40           | 454/Sanger          | Arachne   | GeneMark            | Complete          |
| <i>Stactebbrandtia nassauensis</i> LLR-40K-21    | 2500549403 | 19713    | DSM 44728    | GI02068 | 8kb/40kb         | 454/Sanger          | PGA       | GeneMark            | Draft             |
| <i>Streptobacillus moniformis</i> 9901           | 2500575005 | 29309    | DSM 12112    | GI02312 | 8kb/40kb         | 454/Sanger          | Arachne   | GeneMark            | Complete          |
| <i>Streptosporangium roseum</i> NI 9100          | 2500395335 | 21083    | DSM 43021    | GI02229 | 8kb/40kb         | Sanger              | Arachne   | GeneMark            | Complete          |
| <i>Sulfurospirillum deleyianum</i> 5175          | 2500645361 | 29529    | DSM 6946     | GI02323 | 8kb              | 454/Sanger          | PGA       | GeneMark            | Draft             |
| <i>Thermaerobacter acidimanivorans</i> Su883     | 2500645362 | 29531    | DSM 6589     | GI02247 | 8kb/40kb         | 454/Sanger          | PGA       | GeneMark            | Complete          |
| <i>Thermobaculum terrenum</i> YNP1               | 2500645355 | 29523    | ATCC BAA-798 | GI02489 | 8kb              | 454/Sanger          | Arachne   | GeneMark            | Complete          |
| <i>Thermobispora bispora</i> R51                 | 2500194801 | 20737    | DSM 43833    | GI02237 | 8kb/40kb         | 454/Sanger          | PGA       | GeneMark            | Complete          |
| <i>Thermomonospora curvata</i> B9                | 2500645351 | 20825    | DSM 43183    | GI02238 | 8kb              | 454/Sanger          | PGA       | GeneMark            | Complete          |
| <i>Tsukamurella paurometabola</i>                | 2500575010 | 29399    | DSM 20162    | GI02254 | 8kb/40kb         | 454/Sanger          | Arachne   | GeneMark            | Complete          |
| <i>Veillonella parvula</i> Te3                   | 2500347300 | 21091    | DSM 2008     | GI02241 | 8kb/40kb         | 454/Sanger          | PGA       | GeneMark            | Complete          |
| <i>Xylanimonas cellulolytica</i> XL107           | 2500153402 | 19715    | DSM 15894    | GI02065 | 8kb              | 454/Sanger          | Arachne   | GeneMark            | Complete          |
